# Supplementary material for: Quinoline H2S donor decorated fluorescent carbon dots: visible light responsive H2S nanocarriers
Source: Royal Society of Chemistry journal article supplement (doi:10.1039/c9tb02157d), 2020-01-01
Supplement: c9tb02157d1.pdf [file c9tb02157d1.pdf]

## Supporting information

### Quinoline H<sub>2</sub>S donor Decorated Fluorescent Carbon Dots: Visible Light Responsive H<sub>2</sub>S Nanocarriers

Manoranjan Bera<sup>a</sup>, Somnath Maji<sup>b</sup>, Amrita Paul<sup>a</sup>, Bikash Kumar Sahoo<sup>a</sup>, Tapas Kumar Maiti<sup>b</sup> and N. D. Pradeep Singh <sup>\*a</sup>

<sup>a</sup> Department of Chemistry, Indian Institute of Technology Kharagpur, 721302 Kharagpur, West Bengal, India. E-mail: ndpradeep@chem.iitkgp.ernet.in

<sup>b</sup> Department of Biotechnology, Indian Institute of Technology Kharagpur, 721302 Kharagpur, West Bengal, India

| Sl. No. | Table of content                                                                                                        | Page No |
|---------|-------------------------------------------------------------------------------------------------------------------------|---------|
| 1       | General scheme for the synthesis of the quinoline H <sub>2</sub> S donor ( <b>5</b> ).                                  | 2       |
| 2       | <sup>1</sup> H, <sup>13</sup> C NMR and HRMS of the compound <b>4</b> & <b>5</b>                                        | 3-4     |
| 3       | Measurement of fluorescence quantum yields                                                                              | 5       |
| 4       | Determination of incident photon flux (I <sub>0</sub> ) of the UV lamp by potassium ferrioxalate actinometry            | 5       |
| 5       | Measurement of photochemical quantum yield for the release of H <sub>2</sub> S from QuH <sub>2</sub> S-CDs ( <b>6</b> ) | 6       |
| 6       | Zeta Potentials of CDs and QuH <sub>2</sub> S-CDs                                                                       | 6       |
| 7       | Tunable Emission Property of Quinoline-Carbon Dots                                                                      | 7       |
| 8       | Control experiment for H <sub>2</sub> S release in the presence of the H <sub>2</sub> S selective fluorescent probe (D) | 7       |
| 9       | Hydrolytic stability of QuH <sub>2</sub> S-CD in biological environment                                                 | 8       |
| 10      | Characterization of adduct (A) formed during H <sub>2</sub> S detection                                                 | 9       |
| 11      | Methylene Blue assay for H <sub>2</sub> S quantification                                                                | 10      |
| 12      | Determination of the percentage of H <sub>2</sub> S release from QuH <sub>2</sub> S-CDs                                 | 11      |
| 13      | Characterization of photoproduct via parallel experiment                                                                | 12      |
| 14      | Confocal imaging for H <sub>2</sub> S release using fluorescence probe                                                  | 13      |
| 15      | References                                                                                                              | 13      |

1. General scheme for the synthesis of the Quinoline H<sub>2</sub>S donor (5).

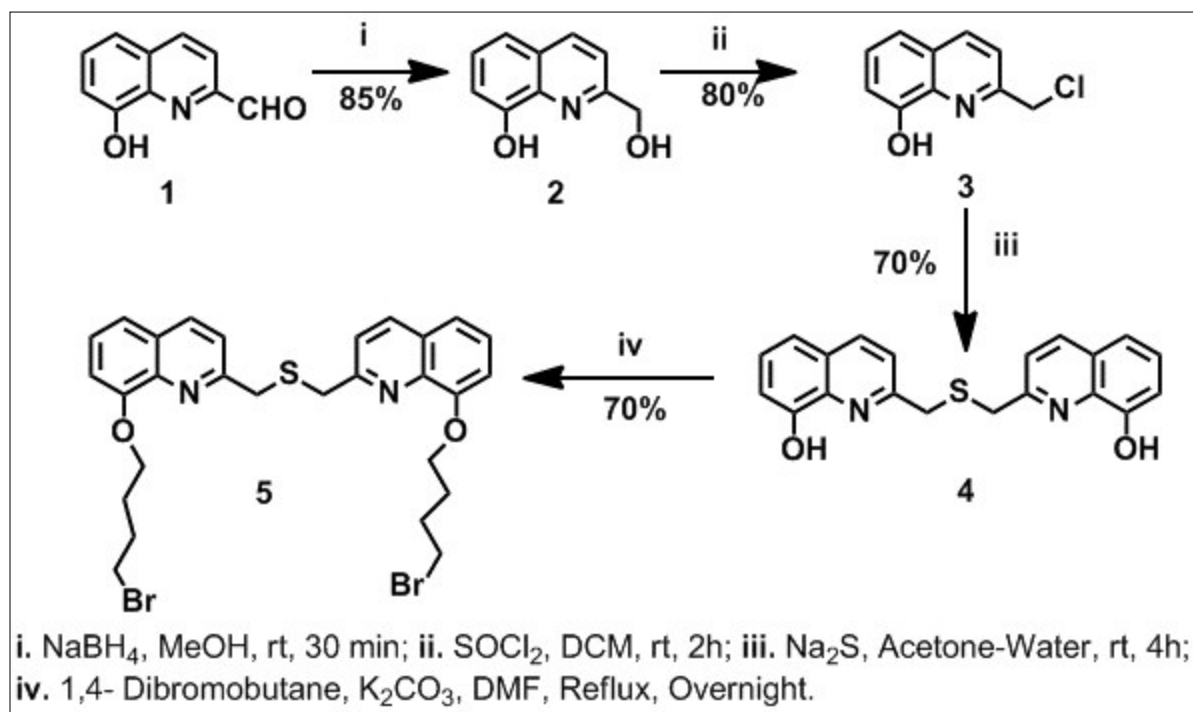

**Scheme S1** Synthetic scheme of the quinoline H<sub>2</sub>S donor **QuH<sub>2</sub>S (5)**.

## 2. Characterization of synthesized molecules and photoproduct by NMR Spectroscopy:

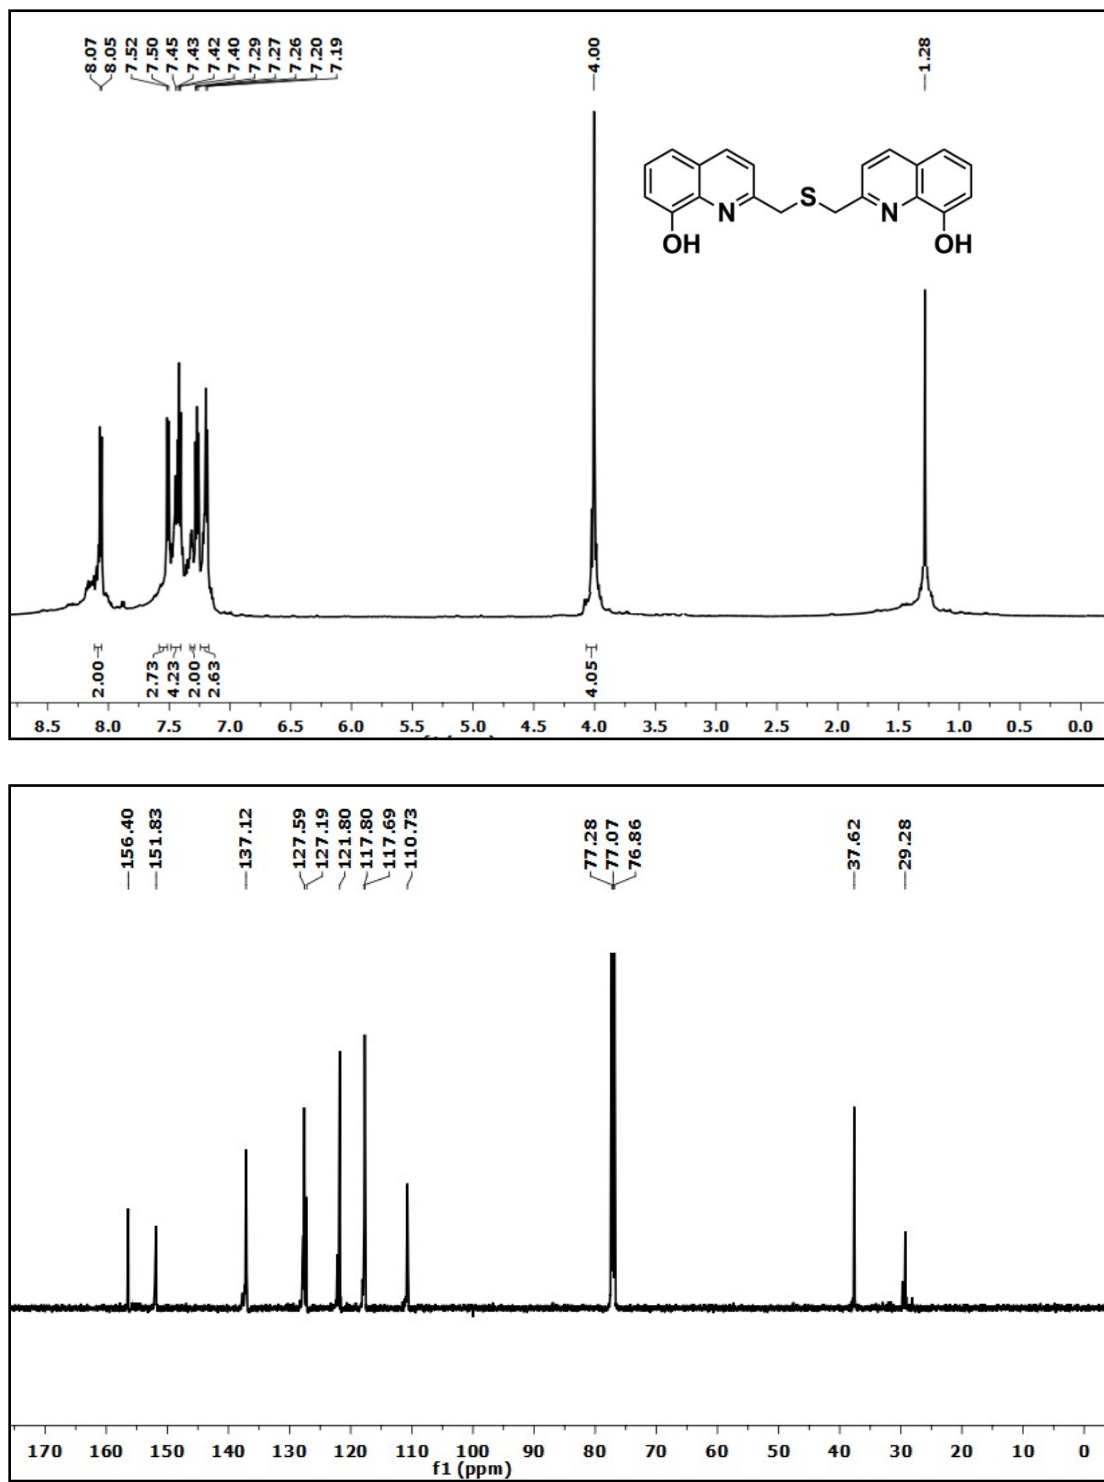

**Fig. S1.**  $^1\text{H}$  and  $^{13}\text{C}$  NMR spectra of **4** in  $\text{CDCl}_3$ .

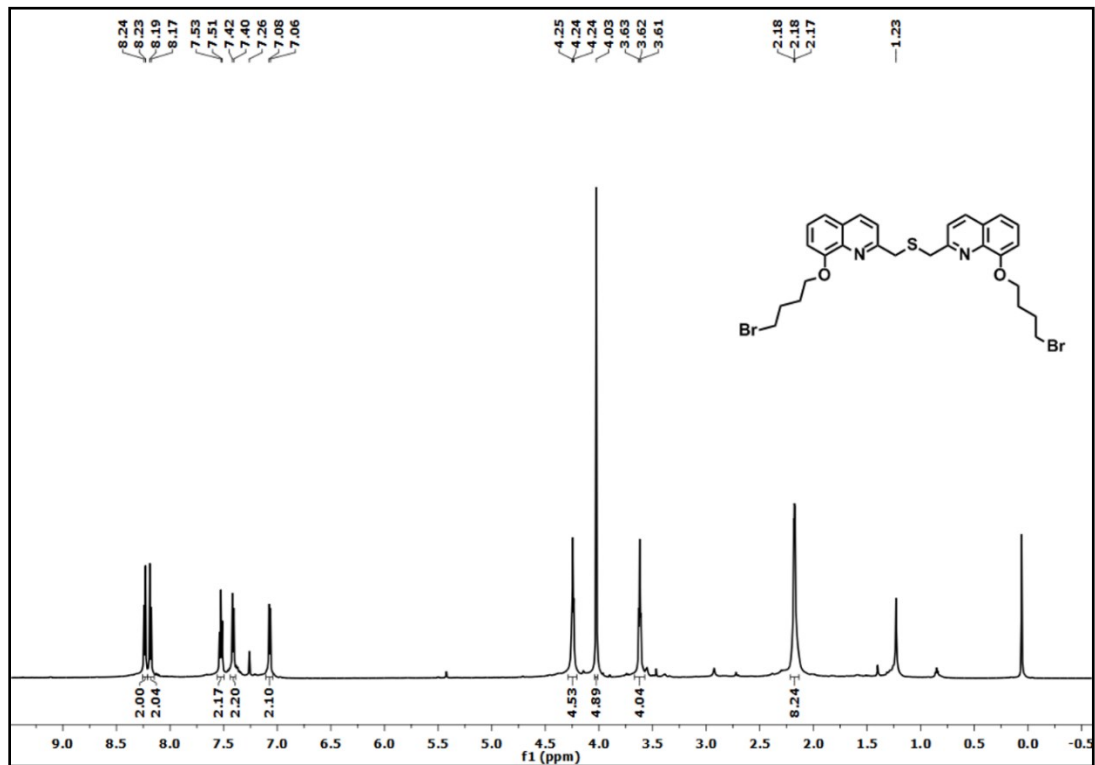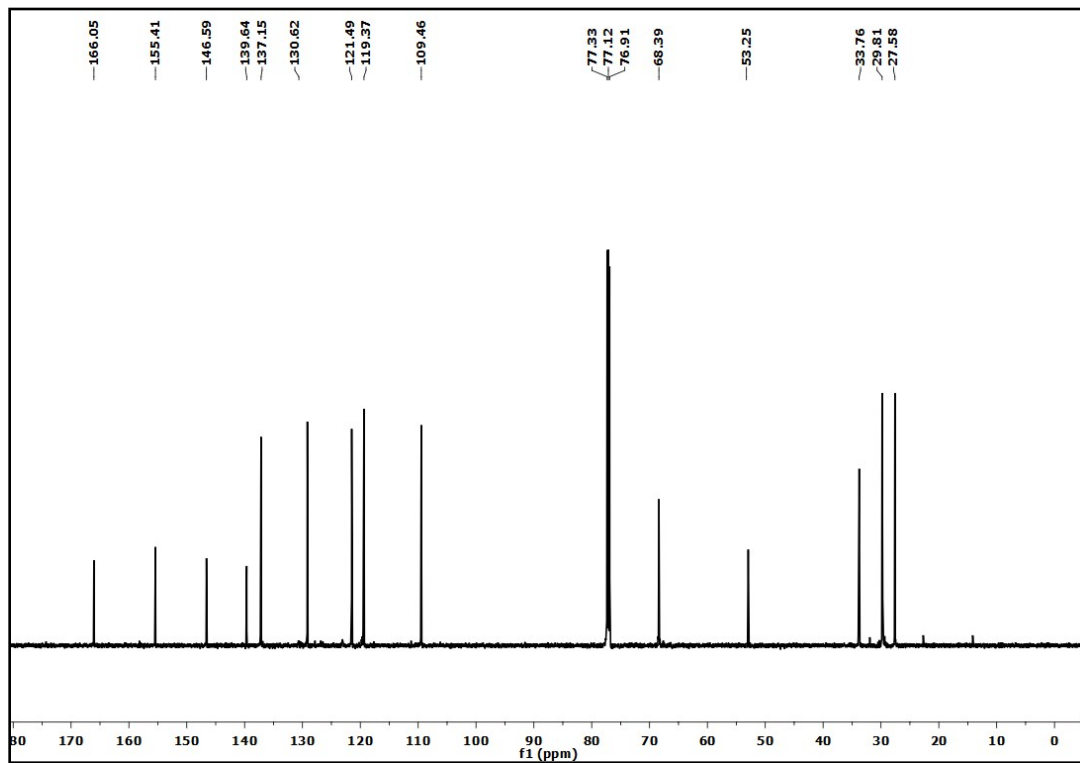

**Fig. S2.**  $^1\text{H}$  and  $^{13}\text{C}$  NMR spectra of **5** in  $\text{CDCl}_3$ .

### 3. Measurement of fluorescence quantum yield

The fluorescence quantum yield (QY) of the carbon dots (CDs) and QuH<sub>2</sub>S-CDs were determined by the reference point method.<sup>[1]</sup> Quinine sulphate in 0.1 M H<sub>2</sub>SO<sub>4</sub> (literature quantum yield: 54 %) was used as a standard sample to calculate the QY of CDs and QuH<sub>2</sub>S-CDs, which were dissolved in methanol. The absorbance values of the solutions at the excitation wavelength were measured by UV–Vis spectrophotometer. Photoluminescence (PL) emission spectra of all the sample solutions were recorded by Hitachi F-7000 fluorescence spectrophotometer at an excitation wavelength of 410 nm.

$$\frac{\Phi_S}{\Phi_R} = \frac{A_S}{A_R} \frac{(\text{Abs})_R}{(\text{Abs})_S} \frac{\eta_S^2}{\eta_R^2}$$

Where  $\Phi$  represents quantum yield, **Abs** represents absorbance, **A** represents the area under the fluorescence curve, and  $\eta$  is the refractive index of the medium. The subscripts **S** and **R** denote the corresponding parameters for the sample and reference, respectively.

### 4. Determination of incident photon flux ( $I_0$ ) of the UV lamp by potassium ferrioxalate actinometry:

Potassium ferrioxalate actinometry was used for the determination of incident photon flux ( $I_0$ ) of the UV lamp used for irradiation. Solution of potassium ferrioxalate, 1,10-phenanthroline and the buffer solution were prepared following the literature procedure.<sup>[2]</sup> 0.006 M solution of potassium ferrioxalate was irradiated using 125 W medium pressure Hg lamp with 1 M NaNO<sub>2</sub> solution (UV cut-off filter), as visible light source ( $\geq 410$  nm). At regular interval of time (3 min), 1 mL of the aliquots was taken out and to it 3 mL of 1,10-phenanthroline solution and 2 mL of the buffer solution were added and the whole solution was kept in dark for 30 min. The absorbance of red phenanthroline-ferrous complex formed was then measured spectrophotometrically at 510 nm. The amount of Fe<sup>2+</sup> ion was determined from the calibration graph. The calibration graph was plotted by measuring the absorbance of phenanthroline-ferrous complex at several known concentration of Fe<sup>2+</sup> ion in dark. From the slope of the graph the molar absorptivity of the phenanthroline-ferrous complex was calculated to be  $1.10 \times 10^4 \text{ M}^{-1} \text{ cm}^{-1}$  at 510 nm which is

found to be similar to reported value. Using the known quantum yield ( $1.188 \pm 0.012$ ) for potassium ferrioxalate actinometer at 406.7 nm, the number of  $\text{Fe}^{2+}$  ion formed during photolysis and the fraction of light absorbed by the actinometer, the incident intensity ( $I_0$ ) of the 125 W Hg lamp was determined as  $2.886 \times 10^{16}$  quanta  $\text{s}^{-1}$ .

### 5. Measurement of photochemical quantum yield for QuH<sub>2</sub>S-CDs (6):

A solution of 4 mg of the H<sub>2</sub>S donor **6** was prepared in 20 mL ACN/PBS buffer (3:7) and mixed with methylene blue cocktail (as described in “Methylene Blue Assay for H<sub>2</sub>S Quantification” below). Half of the solution was kept in dark and to the remaining half nitrogen was passed and irradiated (keeping the quartz cuvette 5 cm apart from the light source) using 125 W medium pressure Hg lamp as UV light source ( $\geq 410$  nm) and 1 M NaNO<sub>2</sub> solution as UV cut-off filter with continuous stirring for 50 min. At a regular interval of time (10 min), 2 mL of the aliquots were taken and analyzed by UV-Vis spectroscopy. The amount of H<sub>2</sub>S released was calculated from the methylene blue assay. Based on it, we plotted the amount of H<sub>2</sub>S released versus irradiation time. We observed an exponential correlation for the release of H<sub>2</sub>S which suggested a first order reaction kinetics. Further, the photochemical quantum yield ( $\Phi_p$ ) was calculated using below equation (1).

$$(\Phi)_{\text{CG}} = (\Phi)_{\text{act}} \times [(k_p)_{\text{CG}} / (k_p)_{\text{act}}] \times [F_{\text{act}} / F_{\text{CG}}] \text{ ----- (1)}$$

Where the subscript ‘CS’ and ‘act’ denotes caged substrate and actinometer respectively. Ferrioxalate was used as an actinometer.  $\Phi_p$  is the photolysis quantum yield,  $k_p$  is the photolysis rate constant and F is the fraction of light absorbed.

### 6. Zeta Potentials of CDs and QuH<sub>2</sub>S-CDs:

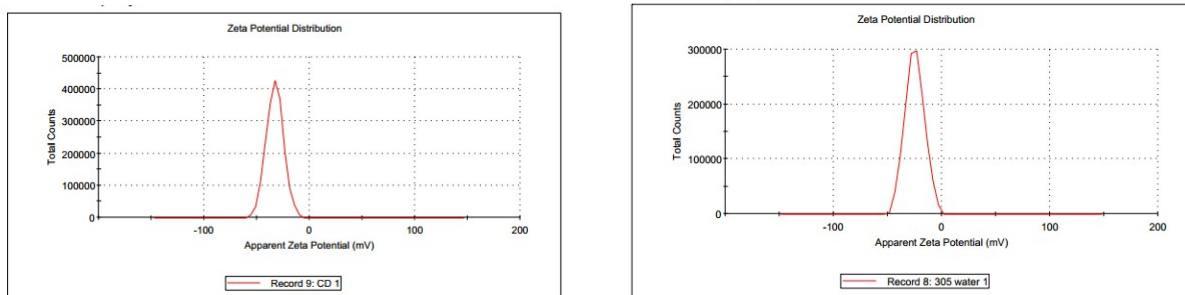

**Fig. S3.** Zeta Potentials of CDs and QuH<sub>2</sub>S-CDs

## 7. Tunable Emission Property of Quinoline-Carbon Dots (QuH<sub>2</sub>S-CDs) (6):

Aqueous suspensions of QuH<sub>2</sub>S-CDs exhibited emission spectra in the visible region with the maxima strictly depending on the excitation wavelength (**Fig. S4**).<sup>[3]</sup>

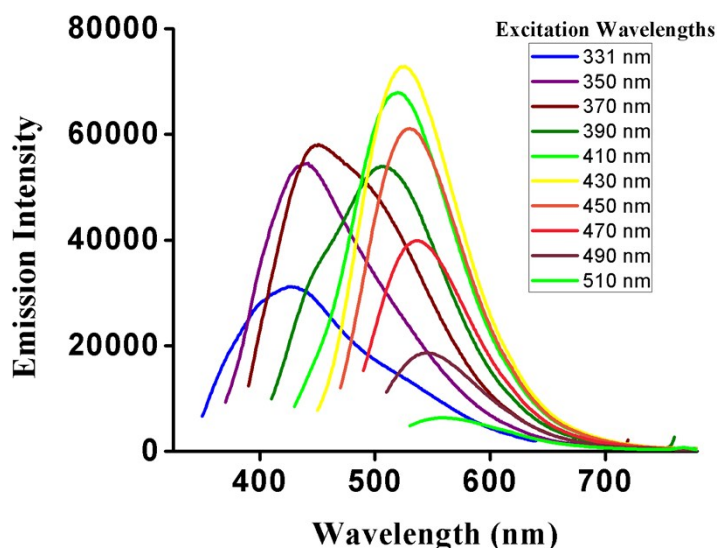

**Fig. S4.** Emission spectra of QuH<sub>2</sub>S-CDs (6) with different excitation wavelength.

## 8. Control experiment for H<sub>2</sub>S release in the presence of the H<sub>2</sub>S selective fluorescent probe (D):

We performed the control experiment with CDs and QuH<sub>2</sub>S in the presence of the H<sub>2</sub>S selective fluorescent probe D (**Fig. S7**). We observed that CDs showed no effect and QuH<sub>2</sub>S showed very little effect in the given condition i.e., in aqueous PSB buffer medium at  $\lambda \geq 410$  nm. This proves that the effect shown by our system during H<sub>2</sub>S detection experiment is really attributed to the QuH<sub>2</sub>S-CDs. The control experiment with CDs and QuH<sub>2</sub>S in the presence of the H<sub>2</sub>S selective fluorescent probe D is provided as **Fig. S7** and discussed in the section ....

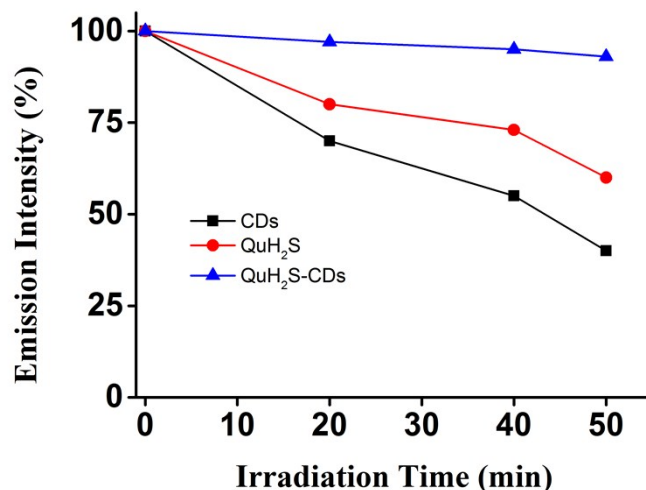

**Fig. S5** Change in the fluorescence intensity of fluorescent probe D in presence of CDs, QuH<sub>2</sub>S, QuH<sub>2</sub>S-CDs at different irradiation ( $\lambda \geq 410$  nm) time intervals in aqueous PBS buffer medium.

### 9. Hydrolytic stability of QuH<sub>2</sub>S-CD in biological environment:

We thank the reviewer for this valuable suggestion. To check the stability of QuH<sub>2</sub>S-CD in the presence of reactive cellular species, such as cysteine and glutathione, in the biological environment, we prepared the solution of QuH<sub>2</sub>S-CD (5 mg/mL) in PBS buffer containing 10 % fetal bovine serum (FBS) at pH = 7.4 and added the solution of thiols (5 mM) (e.g; N-acetyl cysteine (NAC-SH) and GSH) separately to it. After 7 days, aliquots were taken from each sample and the UV-Vis absorption spectra were recorded. The results showed that the photodecomposition of QuH<sub>2</sub>S-CD was negligible. Hence, in the presence of cellular thiols (cysteine and GSH) our designed QuH<sub>2</sub>S-CD donors exhibited sufficient stability and could be suitable for biological applications.



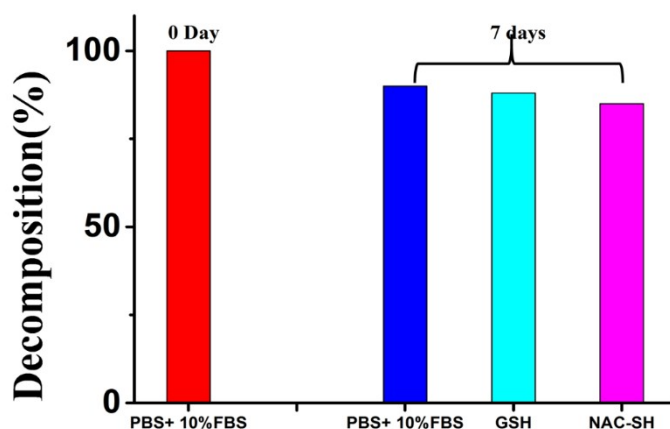

**Fig. S6** Decomposition of QuH<sub>2</sub>S-CD donors (1 mg/ mL) in PBS buffer containing 10 % fetal bovine serum (FBS) at pH = 7.4, NAC-SH and GSH (5 mM) at pH = 7.4 during testing the hydrolytic stability for 7 days.

### 10. Characterization of adduct (A) formed during H<sub>2</sub>S detection:

We carried out the experiment using Na<sub>2</sub>S as a standard H<sub>2</sub>S donor with the dye (D) and observed the changes both in UV-Visible and emission spectroscopy. We isolated the adduct (A) and recorded the UV-Vis and emission spectra of the adduct A. We found the spectroscopic data of the adduct (A) matched with our experimental results.

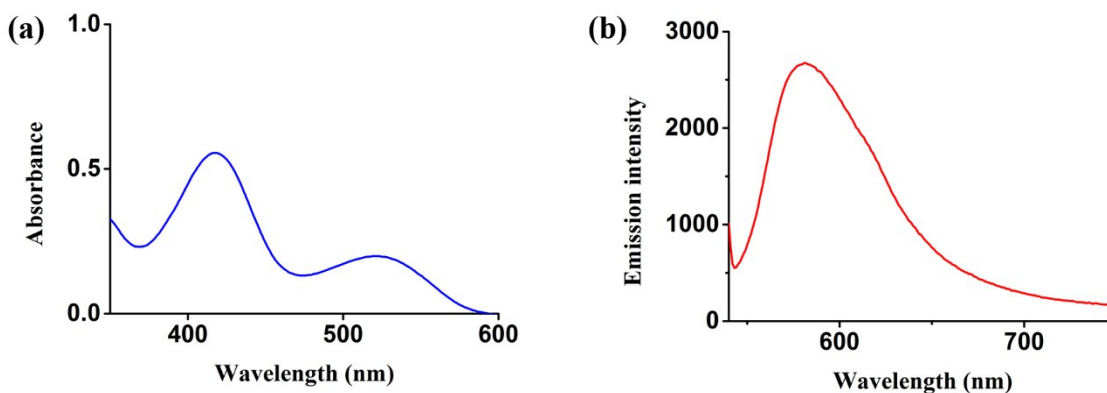

**Fig. S7** UV-Visible (a) and emission (b) spectra of the Dye D.

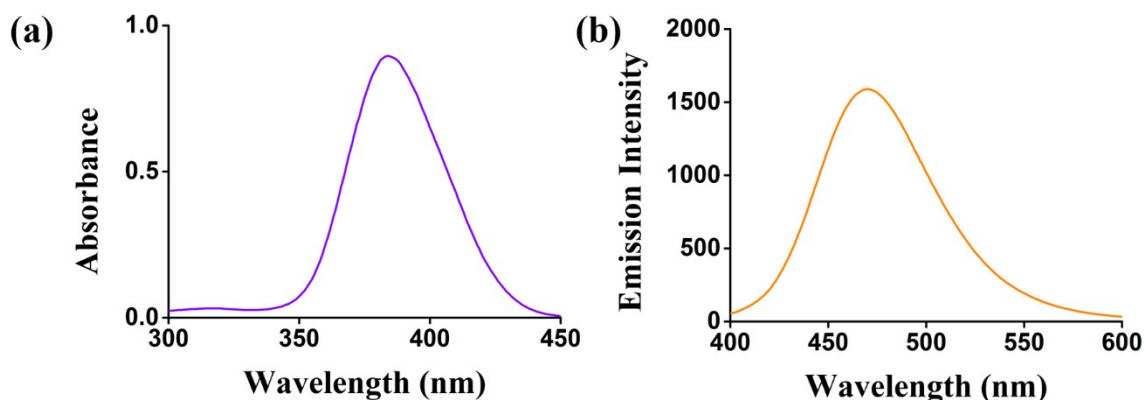

**Fig. S8** UV-Visible (a) and emission (b) spectra of the Adduct A.

HRMS: calcd for the adduct (A)  $C_{18}H_{22}N_2S_3$   $[M+H]^+$ , 362.0965; found: 362.0945.

### 11. Methylene Blue Assay for $H_2S$ Quantification:

Methylene blue assay was carried out as described previously with some modifications.<sup>[4]</sup> A 5 mM solution of  $Na_2S$  in sodium phosphate buffer (20 mM, pH 7.4)/acetonitrile (HPLC grade) (7:3) was prepared ( $Na_2S \cdot 9H_2O$ , 120.20 mg in 100 mL volumetric flask) and used as the stock solution. Aliquots of 100, 200, 300, 500, 700, 1000  $\mu L$  of the  $Na_2S$  stock solution were added into a 50 mL volumetric flask and dissolved in a mixture of sodium phosphate buffer/acetonitrile to obtain the standard solutions in 10, 20, 30, 50, 70, 100  $\mu M$ , respectively. 1 mL aliquot of the respective solution was reacted with the methylene blue (MB<sup>+</sup>) cocktail: 30 mM  $FeCl_3$  (400  $\mu L$ ) in 1.2 M HCl, 20 mM of N,N-dimethyl-1,4-phenylenediamine sulfate (400  $\mu L$ ) in 7.2 mM HCl, 1% w/v of  $Zn(OAc)_2$  (100  $\mu L$ ) in  $H_2O$  at room temperature for at least 15 min (each reaction was performed in triplicate). The absorbance of methylene blue was measured at  $\lambda_{max} = 663$  nm. To obtain the molar absorptivity of (MB<sup>+</sup>) a linear regression was plotted with the observed absorbance and concentration. Fig. S5. Standard Calibration curve with different concentration of  $Na_2S$ .

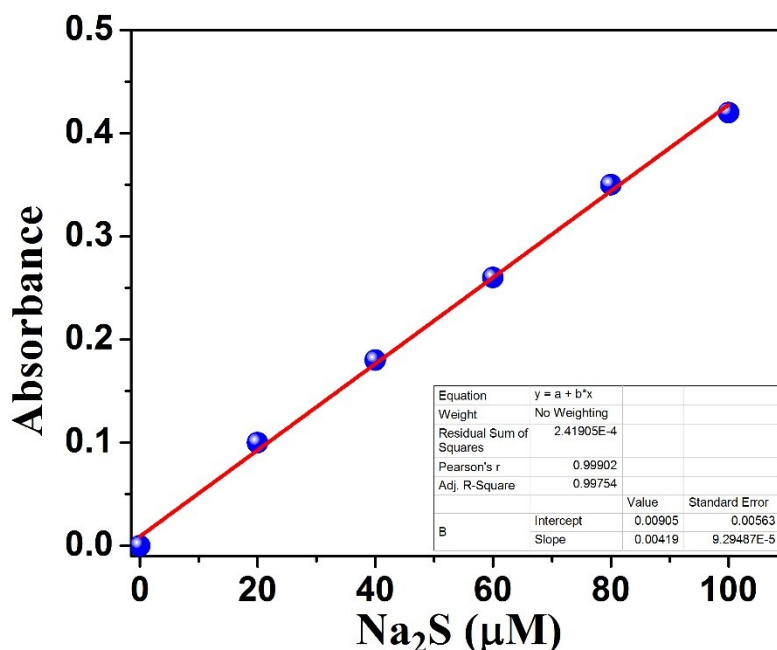

**Fig. S9.** Standard Calibration curve with different concentration of Na<sub>2</sub>S.

In this experiment, a 100 µM solution (total volume 20 mL) of the compound **6** was prepared in a 7:3 solution of sodium phosphate buffer (20 mM, pH 7.4)/acetonitrile. This solution was placed in a 24 mL scintillation vial. The resulting reaction vessel was irradiated with a 125 W medium-pressure mercury lamp as the source of UV-Vis light ( $\lambda \geq 365$  nm) using a suitable UV cut-off filter (1M CuSO<sub>4</sub> solution) with continuous stirring. The aliquot (1 mL) was collected at different time intervals (5, 10, 15, and 20 min) and was mixed immediately with the methylene blue cocktail: 30 mM FeCl<sub>3</sub> (200 µL) in 1.2 M HCl, 20 mM of N,N-dimethyl-1,4-phenylenediamine sulfate (200 µL) in 7.2 mM HCl, 1% w/v of Zn(OAc)<sub>2</sub> (100 µL) in H<sub>2</sub>O at room temperature for at least 20 min. The absorbance of methylene blue was measured at  $\lambda_{\text{max}} = 663$  nm against a blank: 30 mM FeCl<sub>3</sub> (400 µL) in 1.2 M HCl, 20 mM of N,Ndimethyl-1,4-phenylenediamine sulfate (400 µL) in 7.2 mM HCl, 1% w/v of Zn(OAc)<sub>2</sub> (100 µL) in H<sub>2</sub>O, ACN (500 µL), 20 mM sodium phosphate buffer pH 7.4 (500 µL).

## 12. Determination of the percentage of H<sub>2</sub>S release from QuH<sub>2</sub>S-CDs:

In our current study, we have quantified the amount of H<sub>2</sub>S released from 0.2 mg/mL of QuH<sub>2</sub>S-CDs by methylene blue assay using the below equation:

$$\text{Percentage of H}_2\text{S released} = \frac{\text{Amount of H}_2\text{S released}}{\text{Amount of QuH}_2\text{S loaded on the surface of CDs}} \times 100$$

We found the amount of H<sub>2</sub>S released from 0.2 mg/mL of QuH<sub>2</sub>S-CDs by methylene blue assay was 40 μM.

Also we carried out the loading study of QuH<sub>2</sub>S on CDs using UV-Visible spectroscopy according to the literature procedure<sup>5</sup> and found 65 μg/mg of QuH<sub>2</sub>S loaded on the carbon dot.

Now by using the above equation, we have quantified that ~ 60% of H<sub>2</sub>S released from 0.2 mg/mL of QuH<sub>2</sub>S-CDs.

### 13. Characterization of photoproduct (QuOH-CD) via parallel experiment:

Our designed system QuH<sub>2</sub>S-CDs is the light responsive H<sub>2</sub>S releasing moiety, which produces QuOH as a photoproduct after the release of H<sub>2</sub>S. But characterisation of the photoproduct is very difficult as because there also CD was decorated with the photoproduct.

So that we performed a parallel experiment with a similar type of model system QuH<sub>2</sub>SR and monitor the photorelease experiment in the aqueous PBS buffer (pH ~7.4) medium as same reaction condition we used for the QuH<sub>2</sub>S-CD. We isolated the photoproduct and characterized by 1H-NMR and HRMS. We found the photoproduct matched with QuOH which helps us understand the photorelease mechanism for our carbon dot attached quinoline system.

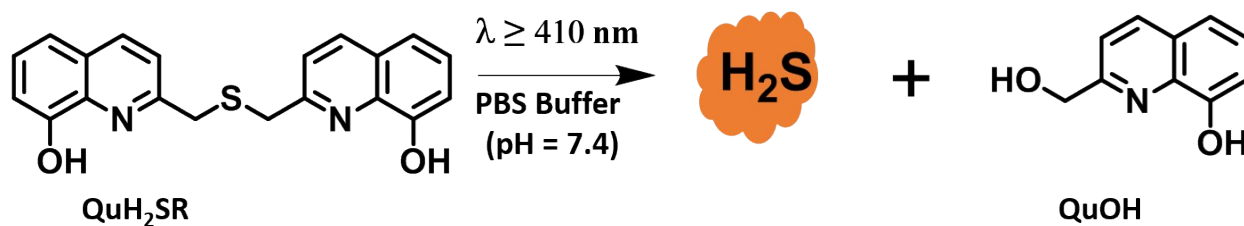

**Scheme 2** Photorelease of H<sub>2</sub>S from QuH<sub>2</sub>S-CDs triggered by visible light in PBS buffer (pH~7.4) medium.

$^1\text{H}$  NMR (500 MHz,  $\text{DMSO-d}_6$ )  $\delta$  8.20 (d,  $J = 8.8$  Hz, 1H), 7.62 (d,  $J = 8.8$  Hz, 1H), 7.47 (t,  $J = 7.8$  Hz, 1H), 7.34 (d,  $J = 8.3$  Hz, 1H), 7.20 (d,  $J = 7.8$  Hz, 1H), 4.83 (s, 2H).

HRMS (ESI+) calcd for  $\text{C}_{10}\text{H}_9\text{NO}_2$   $[\text{M} + \text{H}]^+$ , 175.0633; found: 175.0640.

Hence the increase in the fluorescence of the products can be attributed to the increase in hydrophilicity of the system after the formation of the photoproduct, quinolin-2-ylmethanol-CDs (QuOH-CDs), due to the presence of hydroxyl (hydrophilic) group.

#### 14. Confocal imaging for $\text{H}_2\text{S}$ release using fluorescence probe:

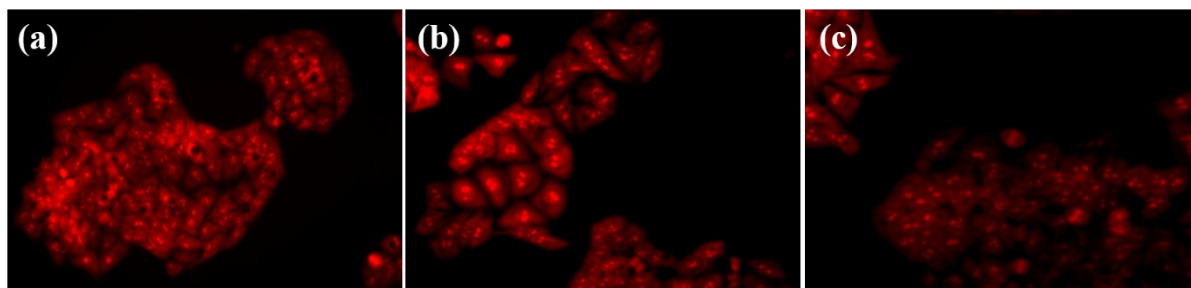

**Fig. S10** Confocal microscopy images of  $\text{H}_2\text{S}$  release from Qu $\text{H}_2\text{S}$ -CDs. Gradual release of  $\text{H}_2\text{S}$  from Qu $\text{H}_2\text{S}$ -CDs was monitored using  $\text{H}_2\text{S}$  sensitive fluorescent probe (D) at different time intervals during irradiation with light ( $\lambda \geq 410$  nm), (a) 0 min; (b) 25 min; (c) 50 min.

#### 15. References:

1. a) S. Mandal, C. Ghatak, V. G. Rao, S. Ghosh, N. Sarkar. *J. Phys. Chem. C*, 2012, **116**, 5585–5597. (b) S. Zhu; Q. Meng; L. Wang; J. Zhang; Y. Song; H. Jin; K. Zhang; H. Sun; H. Wang; B. Yang. *Angew. Chem. Int. Ed.* 2013, **52**, 3953–3957.
2. E. T. Ryan, T. Xiang, K. P. Johnston, M. A. Fox, *J. Phys. Chem. A*, 1997, **101**, 1827–1835.
3. H. Guo, B. You, S. Zhao, Y. Wang, G. Sun, Y. Bai and L. Shi, *RSC Adv.*, 2018, **8**, 24002
4. Y. Zhao, H. Wang and M. Xian, *J. Am. Chem. Soc.*, 2011, **133**, 15.
5. S. Karthik, B. Saha, S. K. Ghosh and N. D. Pradeep Singh, *Chem. Commun.*, 2013, **49**, 10471–10473.
